# Supplementary material for: Self-assembly of cerium-based metal–organic tetrahedrons for size-selectively luminescent sensing natural saccharides
Source: Royal Society of Chemistry journal article supplement (doi:10.1039/b915358f), 2009-01-01

## Supporting Information

# Self-assembly of Cerium-based Metal-Organic Tetrahedrons for Size-Selectively Luminescent Sensing Natural Saccharides

Yang Liu, Xiao Wu, Cheng He, Yang Jiao and Chunying Duan

### Contents

1. **Experimental Section.**
2. **Crystallography**
3. **Figure S1** ESI-MS spectra of **TE1** and **TE2**
4. **Figure S2** Molecular structure of the tetrahedron **TE1** with the atomic-numbering scheme.
5. **Figure S3** The coordination configuration of the Ce(1) centre
6. **Figure S4** The coordination configuration of the Ce(2) centre
7. **Figure S5** The coordination configuration of the Ce(3) centre
8. **Figure S6** The coordination configuration of the Ce(4) centre
9. **Figure S7** Plot of  $\chi_{MT}$  vs.  $T$  of compound **TE1**.
10. **Figure S8** Uv-vis absorption spectra of the respective ligands and the complexes.
11. **Figure S9** Fluorescent spectra of the respective ligands and the complexes.
12. **Figure S10** Family of Uv-vis absorption spectra of **TE1** upon the addition of saccharides.
13. **Figure S11** Family of fluorescent spectra of **TE1** upon the addition of saccharides.
14. **Figure S12** Family of Uv-vis absorption spectra of **TE2** upon the saccharides.
15. **Figure S13** Family of fluorescent spectra of **TE2** in upon the addition of saccharides.
16. **Figure S14** Linear fit for  $\log[(F-F_0)/(F_L-F)]$  vs.  $\log[G]$  for corresponding titration curve of **TE2**
17. **Figure S15** XRD pattern of compound **TE1** data (bottom) and simulation of the XRD according to single crystal diffraction of **TE1** (top).

## 1. Experimental Section.

**1.1 Materials and Methods.** All chemicals were of reagent grade quality obtained from commercial sources and used without further purification. The elemental analyses of C, H and N were performed on a vario EL III elemental analyzer. <sup>1</sup>H NMR spectra were measured on a BRUKER 400M spectrometer. ESI mass spectra were carried out on a HPLC-Q-ToF MS spectrometer using methanol as mobile phase. Uv-vis spectra were measured on a HP 8453 spectrometer. The fluorescent spectra were measured on EDINBURGH FS920. The emission quantum yield of the complexes was estimated with reference to quinine sulfate ( $\Phi_f = 0.546$  in 1N sulfuric acid with excitation at 365 nm)<sup>S1</sup> as the standard.

$$\Phi_{unk} = \Phi_{std} \frac{(I_{unk} / A_{unk})}{(I_{std} / A_{std})} \left( \frac{\eta_{unk}}{\eta_{std}} \right)^2 \quad (1)$$

Where  $\Phi_{unk}$  and  $\Phi_{std}$  are the radiative quantum yields of the sample and standard,  $I_{unk}$  and  $I_{std}$  are the integrated emission intensities of the corrected spectra for the sample and standard,  $A_{unk}$  and  $A_{std}$  are the absorbance of the sample and standard at the excitation wavelength, and  $\eta_{unk}$  and  $\eta_{std}$  are the indices of refraction of the sample and standard solutions, respectively.

## 1.2 Preparation

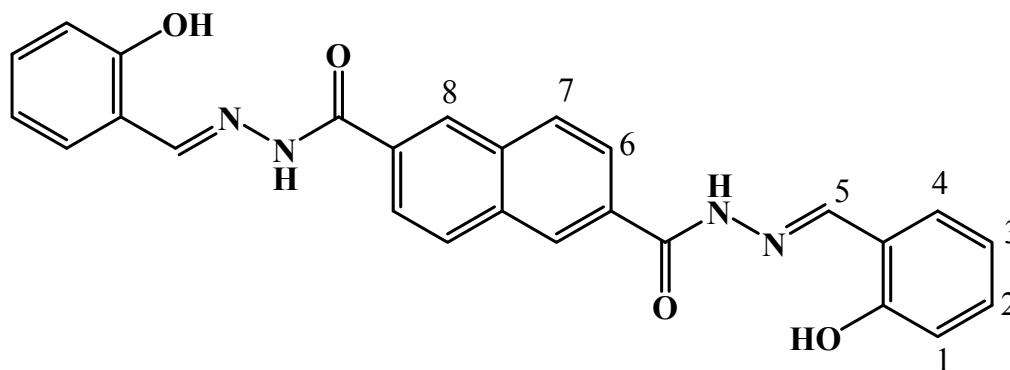

**H<sub>2</sub>L<sup>1</sup>**

**2,6-naphthalene-dicarbohydrazone:** A mixture solution of 80% hydrazine hydrate (40mmol, 2.50g) and dimethyl-2,6-naphthalene-dicarboxylate (4mmol, 0.86g) in methanol (20mL) was stirred over 12h. A white precipitate was formed, which was collected by filtration, washed with methanol and dried in vacuum. Yield: 0.80g, 82%.

**H<sub>2</sub>L<sup>1</sup>:** 2,6-naphthalene-dicarbohydrazone (3 mmol, 0.732g) was added to a CH<sub>3</sub>OH solution (60 mL) containing salicylaldehyde (6.4 mmol, 0.781 g). After 5 drops of acetic acid was added, the yellow mixture was heated at boiling temperature under magnetic stirring for 24h. During the reaction, a pale yellow precipitate was formed, which was collected by filtration. Yield: 1.11g, 82%. Anal calc. for C<sub>26</sub>H<sub>20</sub>N<sub>4</sub>O<sub>4</sub>·2H<sub>2</sub>O: H 4.95, C 63.93, N 11.47%. Found: H 4.90, C 64.00, N 11.16%. <sup>1</sup>H NMR (DMSO-*d*<sub>6</sub>,

ppm): 12.35(s, 2H<sub>NH</sub>), 11.26(s, 2H<sub>OH</sub>), 8.72(s, 2H<sub>5</sub>), 8.65(s, 2H<sub>8</sub>), 8.25(d, 2H<sub>6</sub>, *J* = 8.4Hz), 8.10(d, 2H<sub>7</sub>, *J* = 8.4Hz), 7.60(d, 2H<sub>4</sub>, *J* = 6.8Hz), 7.33(t, 2H<sub>2</sub>, *J* = 8.0Hz), 6.95(m, 2H<sub>3</sub>, 2H<sub>1</sub>).

**TE1:** A solution of Ce(NO<sub>3</sub>)<sub>3</sub>·6H<sub>2</sub>O (8.4 mg, 0.02 mmol), H<sub>2</sub>L<sup>1</sup> ligand (13.6 mg, 0.03mmol) and KOH (3.4 mg, 0.06 mmol) in CH<sub>3</sub>OH/DMF (v:v = 1:7, 8 mL) was stirred for 2h. Then the solution was left for two weeks at room temperature to give X-ray quality black block crystals. Anal calc. for Ce<sub>4</sub>(C<sub>26</sub>H<sub>18</sub>N<sub>4</sub>O<sub>4</sub>)<sub>6</sub>·4C<sub>3</sub>H<sub>7</sub>NO·6H<sub>2</sub>O·2CH<sub>3</sub>OH: H 4.22, C 54.77, N 10.52%. Found: H 4.25, C 54.89, N 10.42 %. Yield: 65%.

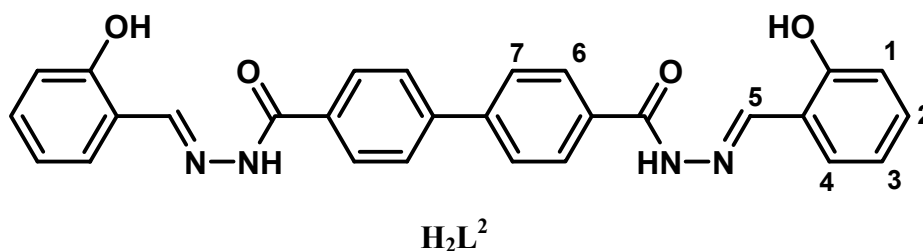

**4,4'-biphenyl-dicarbohydrazide:** A mixture solution of 80% hydrazine hydrate (20mmol, 1.25g) and dimethyl-4,4'-biphenyl-dicarboxylate (2mmol, 0.49g) in methanol (20mL) was stirred over 12h. A white precipitate was formed, which was collected by filtration, washed with methanol and dried in *vacuum*. Yield: 0.43g, 80%

**H<sub>2</sub>L<sup>2</sup>:** 4,4'-biphenyl-dicarbohydrazide (3 mmol, 0.81g) was added to a CH<sub>3</sub>OH solution (60 mL) containing salicylaldehyde (6.4 mmol, 0.78 g). After 5 drops of acetic acid was added, the yellow mixture was heated at boiling temperature under magnetic stirring for 24h. During the reaction, a pale yellow precipitate was formed, which was collected by filtration. Yield: 1.20g, 83%. Anal calc. for C<sub>28</sub>H<sub>22</sub>N<sub>4</sub>O<sub>4</sub>·0.5CH<sub>3</sub>OH: H 4.89, C 69.22, N 11.33 %. Found: H 4.95, C 68.90, N 11.25%. <sup>1</sup>H NMR (DMSO-*d*<sub>6</sub>, ppm): 12.21(s, 2H<sub>NH</sub>), 11.30(s, 2H<sub>OH</sub>), 8.69(s, 2H<sub>5</sub>), 8.09(d, 2H<sub>6</sub>, *J* = 8.4Hz), 7.97(d, 2H<sub>7</sub>, *J* = 8.4Hz), 7.57(d, 2H<sub>4</sub>, *J* = 6.4Hz), 7.32(t, 2H<sub>2</sub>, *J* = 8.0Hz), 6.95(m, 2H<sub>3</sub>, 2H<sub>1</sub>).

**TE2:** A solution of Ce(NO<sub>3</sub>)<sub>3</sub>·6H<sub>2</sub>O (8.4 mg, 0.02 mmol), H<sub>2</sub>L<sup>2</sup> ligand (14.4 mg, 0.03mmol) and KOH (3.4 mg, 0.06 mmol) in CH<sub>3</sub>OH/DMF (v:v = 1:7, 8 mL) was stirred for 2h. Then the solution was left for two weeks at room temperature to give crystalline solid. The solid were dried vacuum. Anal calc. for Ce<sub>4</sub>(C<sub>28</sub>H<sub>22</sub>N<sub>4</sub>O<sub>4</sub>)<sub>6</sub>·2C<sub>3</sub>H<sub>7</sub>NO·2H<sub>2</sub>O: H 4.18, C 57.83, N 10.08 %. Found: H 4.25, C 58.37, N 10.32 %. Yield: 60%.

## Reference

S1 G. A. Crosby and J. N. Demas, *J. Phys. Chem.* 1971, **75**, 991 – 1024.

## 2. Crystallography:

Intensities of **TE1** was collected on a Bruker SMART APEX CCD diffractometer with graphite-monochromated Mo-K $\alpha$  ( $\lambda = 0.71073 \text{ \AA}$ ) using the SMART and SAINT programs. The structures were solved by direct methods and refined on  $F^2$  by full-matrix least-squares methods with SHELXTL *version* 5.1. Crystal data of **TE1** C<sub>170</sub>H<sub>156</sub>Ce<sub>4</sub>N<sub>28</sub>O<sub>36</sub>,  $M = 3727.71$ , monoclinic, space group P2<sub>1</sub>/n, black block,  $a = 24.009 (1)$ ,  $b = 37.450 (1)$ ,  $c = 24.065 (1) \text{ \AA}$ ,  $\beta = 92.650(2)^\circ$ ,  $V = 21614 (1) \text{ \AA}^3$ ,  $Z = 4$ ,  $D_c = 1.146 \text{ g cm}^{-3}$ ,  $\mu(\text{Mo-K}\alpha) = 0.891 \text{ mm}^{-1}$ ,  $T = 180(2) \text{ K}$ . 31778 unique reflections [ $R_{\text{int}} = 0.1333$ ]. Final  $R$  [with  $I > 2\sigma(I)$ ] = 0.0849,  $wR2$  (all data) = 0.1991 for  $2\theta = 47^\circ$ . CCDC number 705880.

In the structural refinement of **TE1**, non-hydrogen atoms, except the disordered solvent molecules were refined anisotropically. Hydrogen atoms within the ligand backbones were fixed geometrically at calculated distances and allowed to ride on the parent non-hydrogen atoms, whereas no hydrogen atoms corresponding to the disordered solvent molecules were added and refined. To assist the stability of refinements, several restraints were applied: (1) Four of the six naphthalene rings, seven of the twelve benzene rings and one hydroxyl oxygen atom were disordered into two parts. Except two of the benzene rings were refined as free variables, the others were refined with the site occupancy factors (*s.o.f.*) being fixed at 0.5. (2) For all the disordered rings, the geometrical constraints of idealized regular polygons were used, the C–C bond distance of the phenyl ring being 1.39  $\text{\AA}$  and the diagonal C–C distance of the phenyl ring being 2.78  $\text{\AA}$ . (3) thermal parameters on adjacent atoms in the disordered moieties were restrained to be similar. (4) Several partially occupied solvent molecules were disordered with the *s.o.f.* being fixed at suitable value. On the checkcif report, the short interatom separations are due to the disorder of corresponding solvent molecules.

**3. Figure S1** ESI-MS of **TE1** (top) and **TE2** (Bottom) in DMF/CH<sub>3</sub>OH in present of KOH (0.1mM). The insert exhibits the measured and simulated isotopic patterns at 1097.45 (for **TE1**) and 1137.19 (for **TE2**) respectively.

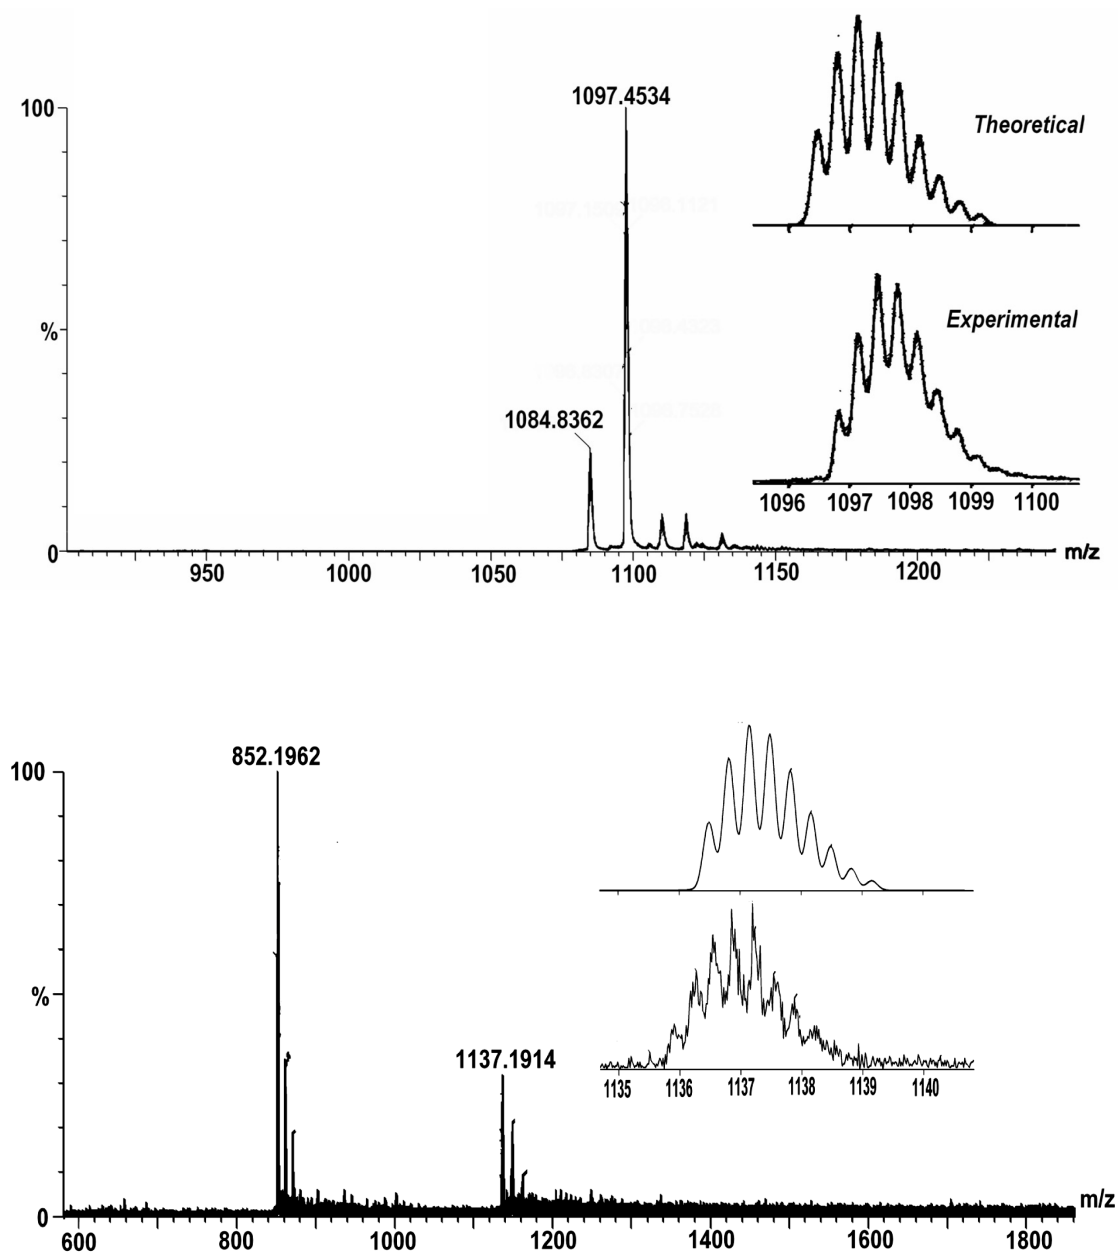

4. **Figure S2** Molecular structure of the tetrahedron in **TE1**, including the disordered parts of ligands. The hydrogen atoms and solvent molecules were omitted for clarity.

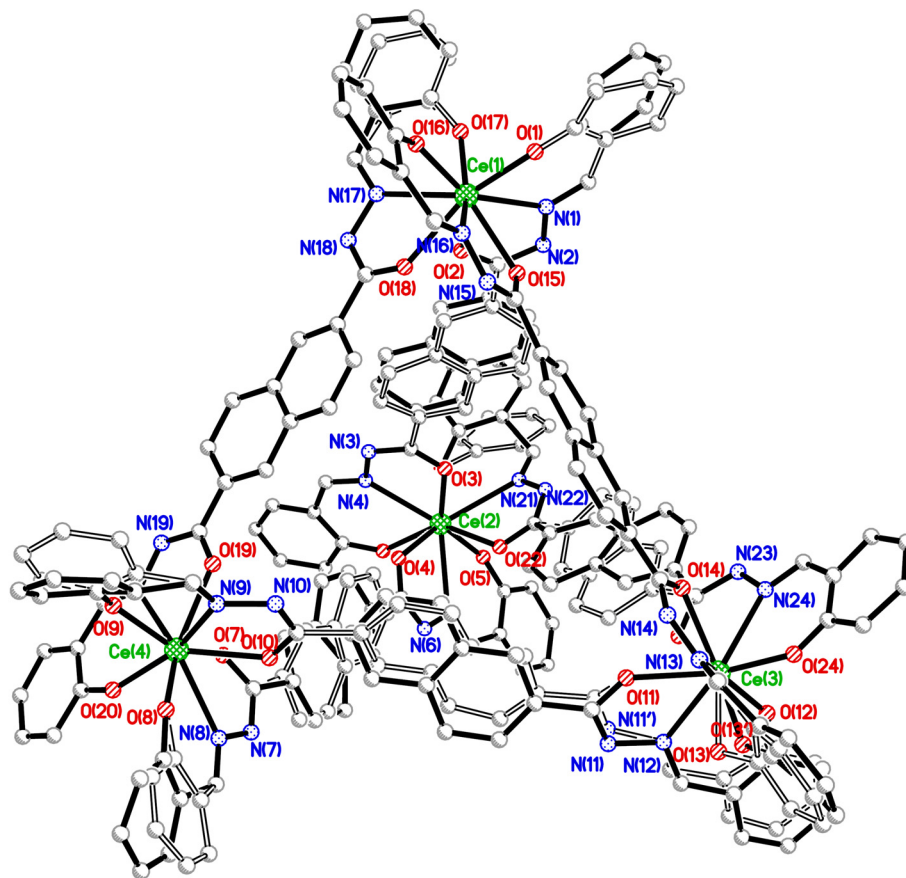

**5. Figure S3** The coordination configuration of the Ce(1) centre in **TE1**. The bond lengths (Å) and angles (°) of the Ce(1) centre: Ce(1)–O(1) 2.229(3), Ce(1)–O(2) 2.414(4), Ce(1)–O(15) 2.412(4), Ce(1)–O(16) 2.224(4), Ce(1)–O(17) 2.212(4), Ce(1)–O(18) 2.448(4), Ce(1)–N(1) 2.595(5), Ce(1)–N(16) 2.607(5), Ce(1)–N(17) 2.687(4); O(17)–Ce(1)–O(16) 84.6(2), O(17)–Ce(1)–O(1) 86.6(2), O(16)–Ce(1)–O(1) 85.5(1), O(17)–Ce(1)–O(2) 86.0(2), O(16)–Ce(1)–O(2) 141.8(1), O(1)–Ce(1)–O(2), 130.5(1), O(17)–Ce(1)–O(15) 143.8(2), O(16)–Ce(1)–O(15) 130.1(2), O(1)–Ce(1)–O(15) 83.8(1), O(2)–Ce(1)–O(15) 74.3(1), O(17)–Ce(1)–O(18) 129.7(2), O(16)–Ce(1)–O(18) 88.4(1), O(1)–Ce(1)–O(18) 142.2(1), O(2)–Ce(1)–O(18) 70.6(1), O(15)–Ce(1)–O(18) 72.1(1), O(17)–Ce(1)–N(1) 76.1(2), O(16)–Ce(1)–N(1) 148.2(2), O(1)–Ce(1)–N(1) 69.3(2), O(2)–Ce(1)–N(1) 61.4(1), O(15)–Ce(1)–N(1) 67.8(2), O(18)–Ce(1)–N(1) 123.4(2), O(17)–Ce(1)–N(16) 150.2(2), O(16)–Ce(1)–N(16) 68.8(2), O(1)–Ce(1)–N(16) 80.5(2), O(2)–Ce(1)–N(16) 122.6(2), O(15)–Ce(1)–N(16) 61.4(2), O(18)–Ce(1)–N(16) 62.6(1), N(1)–Ce(1)–N(16) 122.9(2), O(17)–Ce(1)–N(17) 67.1(1), O(16)–Ce(1)–N(17) 76.1(1), O(1)–Ce(1)–N(17) 149.2(2), O(2)–Ce(1)–N(17) 65.9(1), O(15)–Ce(1)–N(17) 127.0(1), O(18)–Ce(1)–N(17) 62.7(1), N(1)–Ce(1)–N(17) 116.4(2), N(16)–Ce(1)–N(17) 114.3(1).

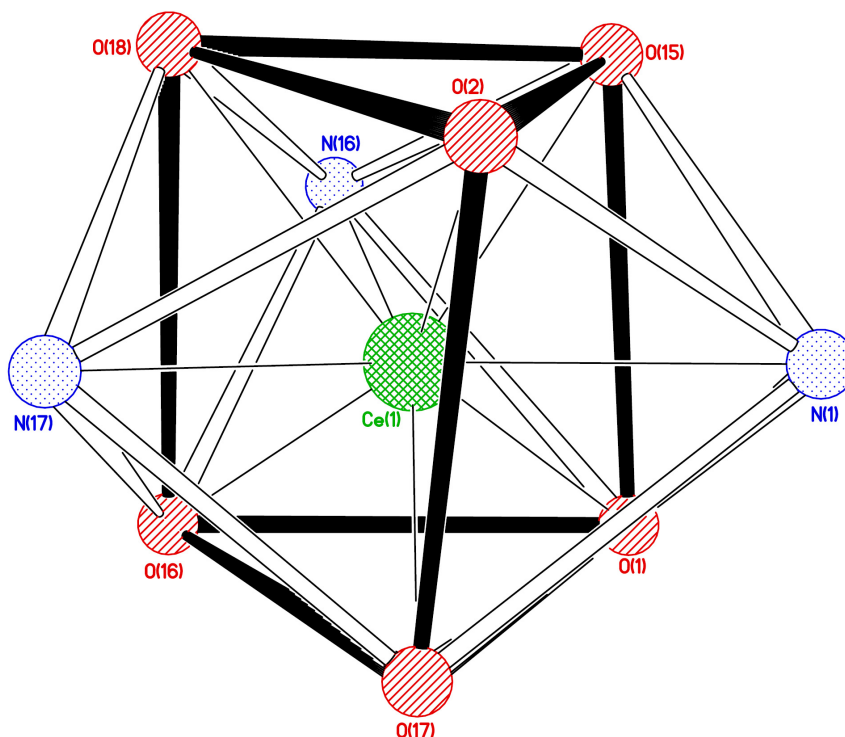

**6. Figure S4** The coordination configuration of the Ce(2) centre in **TE1**. The bond lengths (Å) and angles (°) of the Ce(2) centre: Ce(2)–O(3) 2.317(4), Ce(2)–O(4) 2.230(4), Ce(2)–O(5) 2.187(3), Ce(2)–O(6) 2.445(4), Ce(2)–O(21) 2.167(4), Ce(2)–O(22) 2.491(4), Ce(2)–N(4) 2.594(5), Ce(2)–N(5) 2.674(5), Ce(2)–N(21) 2.614(5); O(21)–Ce(2)–O(5) 84.6(2), O(21)–Ce(2)–O(4) 87.0(2), O(5)–Ce(2)–O(4) 85.5(1), O(21)–Ce(2)–O(3) 85.9(2), O(5)–Ce(2)–O(3) 140.0(1), O(4)–Ce(2)–O(3) 132.8(1), O(21)–Ce(2)–O(6) 143.5(2), O(5)–Ce(2)–O(6) 129.2(1), O(4)–Ce(2)–O(6) 83.5(1), O(3)–Ce(2)–O(6) 75.4(1), O(21)–Ce(2)–O(22) 128.7(1), O(5)–Ce(2)–O(22) 87.1(1), O(4)–Ce(2)–O(22) 142.6(1), O(3)–Ce(2)–O(22) 69.2(1), O(6)–Ce(2)–O(22) 73.3(1), O(21)–Ce(2)–N(4) 77.1(2), O(5)–Ce(2)–N(4) 150.8(2), O(4)–Ce(2)–N(4) 71.2(2), O(3)–Ce(2)–N(4) 61.7(1), O(6)–Ce(2)–N(4) 66.5(2), O(22)–Ce(2)–N(4) 122.1(2), O(21)–Ce(2)–N(21) 69.7(1), O(5)–Ce(2)–N(21) 75.5(1), O(4)–Ce(2)–N(21) 150.8(2), O(3)–Ce(2)–N(21) 64.8(1), O(6)–Ce(2)–N(21) 125.7(1), O(22)–Ce(2)–N(21) 59.2(1), N(4)–Ce(2)–N(21) 117.8(2), O(21)–Ce(2)–N(5) 150.6(2), O(5)–Ce(2)–N(5) 69.0(2), O(4)–Ce(2)–N(5) 78.3(2), O(3)–Ce(2)–N(5) 122.7(2), O(6)–Ce(2)–N(5) 60.2(1), O(22)–Ce(2)–N(5) 64.8(1), N(4)–Ce(2)–N(5) 120.5(2), N(21)–Ce(2)–N(5) 113.7(2).

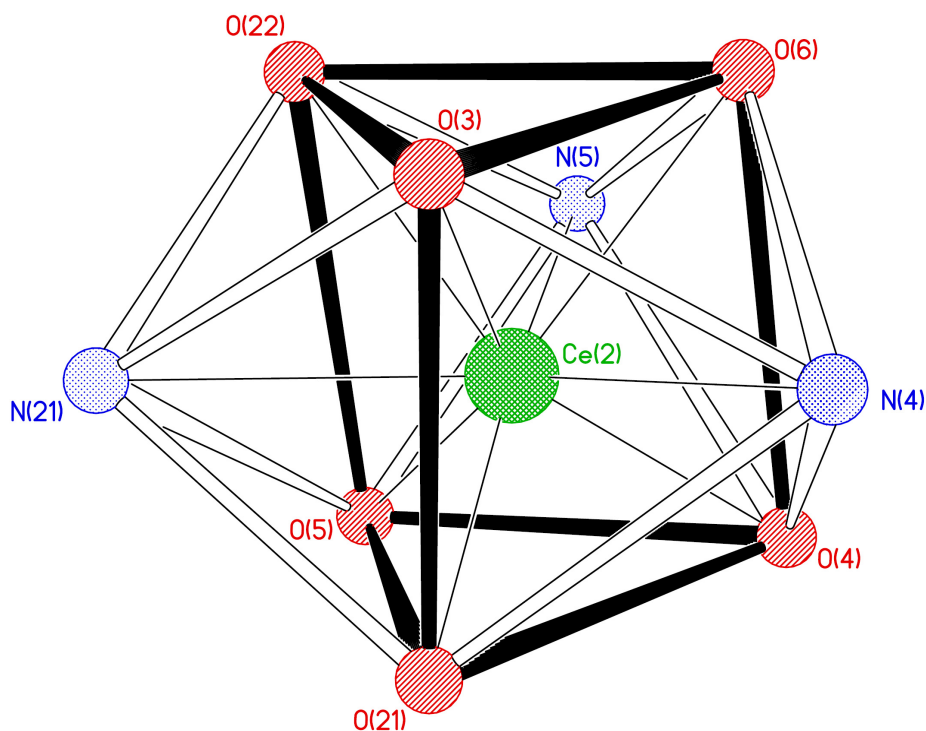



**7. Figure S5** The coordination configuration of the Ce(3) centre in **TE1**, the disordered O(13') atom was omitted. The bond lengths and angles of the Ce(3) centre: Ce(3)–O(11) 2.357(4), Ce(3)–O(12) 2.221(5), Ce(3)–O(13) 2.126(8), Ce(3)–O(13') 2.335(8), Ce(3)–O(14) 2.437(4), Ce(3)–O(23) 2.374(4), Ce(3)–O(24) 2.160(3), Ce(3)–N(12) 2.612(6), Ce(3)–N(13) 2.561(6), Ce(3)–N(24) 2.644(5); O(24)–Ce(3)–O(13) 87.7(2), O(24)–Ce(3)–O(12) 85.0(2), O(13)–Ce(3)–O(12) 77.3(3), O(24)–Ce(3)–O(13') 76.8(2), O(12)–Ce(3)–O(13') 89.1(2), O(24)–Ce(3)–O(11) 140.7(2), O(13)–Ce(3)–O(11) 88.1(3), O(12)–Ce(3)–O(11) 131.8(2), O(13')–Ce(3)–O(11) 88.8(2), O(24)–Ce(3)–O(23) 129.9(2), O(13)–Ce(3)–O(23) 135.8(2), O(12)–Ce(3)–O(23) 83.3(2), O(13')–Ce(3)–O(23) 151.0(2), O(11)–Ce(3)–O(23) 75.9(2), O(24)–Ce(3)–O(14) 89.2(2), O(13)–Ce(3)–O(14) 136.0(6), O(12)–Ce(3)–O(14) 146.0(1), O(13')–Ce(3)–O(14) 122.0(2), O(11)–Ce(3)–O(14) 67.7(2), O(23)–Ce(3)–O(14) 75.0(2), O(24)–Ce(3)–N(13) 73.3(2), O(13)–Ce(3)–N(13) 76.1(3), O(12)–Ce(3)–N(13) 146.0(2), O(13')–Ce(3)–N(13) 61.0(2), O(11)–Ce(3)–N(13) 67.8(2), O(23)–Ce(3)–N(13) 130.6(2), O(14)–Ce(3)–N(13) 61.0(2), O(24)–Ce(3)–N(12) 146.6(2), O(13)–Ce(3)–N(12) 66.6(3), O(12)–Ce(3)–N(12) 69.4(2), O(13')–Ce(3)–N(12) 81.7(2), O(11)–Ce(3)–N(12) 62.7(3), O(23)–Ce(3)–N(12) 69.5(2), O(14)–Ce(3)–N(12) 124.0(2), N(13)–Ce(3)–N(12) 117.3(2), O(24)–Ce(3)–N(24) 65.5(2), O(13)–Ce(3)–N(24) 147.7(2), O(12)–Ce(3)–N(24) 82.6(2), O(13')–Ce(3)–N(24) 141.8(2), O(11)–Ce(3)–N(24) 122.9(2), O(23)–Ce(3)–N(24) 64.8(1), O(14)–Ce(3)–N(24) 64.7(2), N(13)–Ce(3)–N(24) 110.2(2), N(12)–Ce(3)–N(24) 128.4(2).

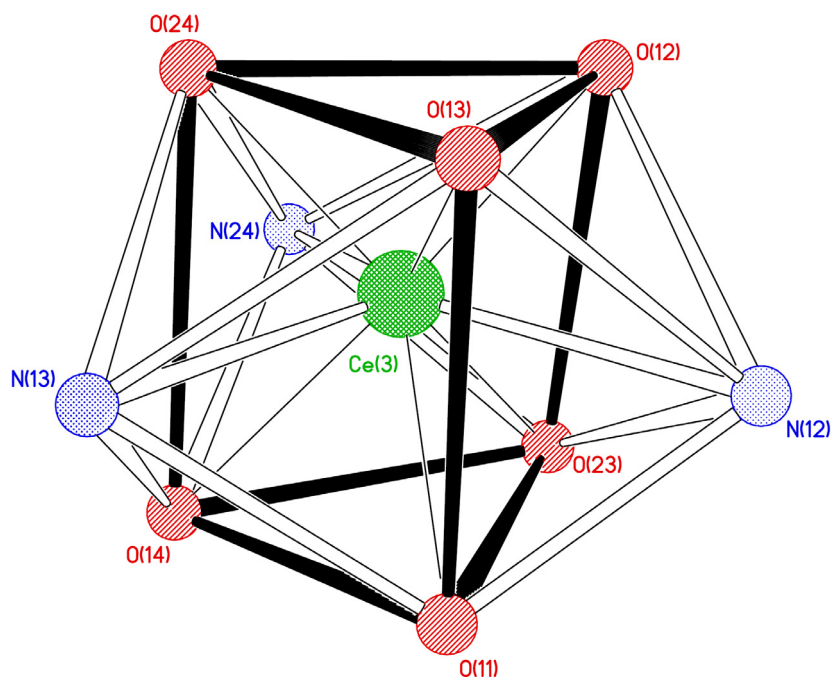

**8. Figure S6** The coordination configuration of the Ce(4) centre in **TE1**. The bond lengths and angles of the Ce(4) centre: Ce(4)–O(8) 2.159(4), Ce(4)–O(20) 2.189(3), Ce(4)–O(9) 2.238(4), Ce(4)–O(10) 2.379(4), Ce(4)–O(19) 2.395(4), Ce(4)–O(7) 2.481(4), Ce(4)–N(8) 2.622(5), Ce(4)–N(20) 2.656(5), Ce(4)–N(9) 2.660(5); O(8)–Ce(4)–O(20) 85.4(2), O(8)–Ce(4)–O(9) 84.6(2), O(20)–Ce(4)–O(9) 88.0(1), O(8)–Ce(4)–O(10) 88.1(2), O(20)–Ce(4)–O(10) 139.3(2), O(9)–Ce(4)–O(10) 131.3(1), O(8)–Ce(4)–O(19) 142.1(2), O(20)–Ce(4)–O(19) 129.6(1), O(9)–Ce(4)–O(19) 83.2(2), O(10)–Ce(4)–O(19) 73.8(1), O(8)–Ce(4)–O(7) 129.5(2), O(20)–Ce(4)–O(7) 84.4(1), O(9)–Ce(4)–O(7) 144.1(1), O(10)–Ce(4)–O(7) 69.2(1), O(19)–Ce(4)–O(7) 75.2(1), O(8)–Ce(4)–N(8) 68.4(2), O(20)–Ce(4)–N(8) 76.2(2), O(9)–Ce(4)–N(8) 149.5(2), O(10)–Ce(4)–N(8) 64.1(2), O(19)–Ce(4)–N(8) 127.0(2), O(7)–Ce(4)–N(8) 61.0(1), O(8)–Ce(4)–N(20) 149.7(1), O(20)–Ce(4)–N(20) 68.5(1), O(9)–Ce(4)–N(20) 79.5(1), O(10)–Ce(4)–N(20) 121.6(1), O(19)–Ce(4)–N(20) 61.2(1), O(7)–Ce(4)–N(20) 65.0(1), N(8)–Ce(4)–N(20) 117.0(2), O(8)–Ce(4)–N(9) 76.6(2), O(20)–Ce(4)–N(9) 151.4(2), O(9)–Ce(4)–N(9) 68.5(1), O(10)–Ce(4)–N(9) 63.0(1), O(19)–Ce(4)–N(9) 65.5(1), O(7)–Ce(4)–N(9) 124.2(1), N(8)–Ce(4)–N(9) 116.2(2), N(20)–Ce(4)–N(9) 120.0(2).

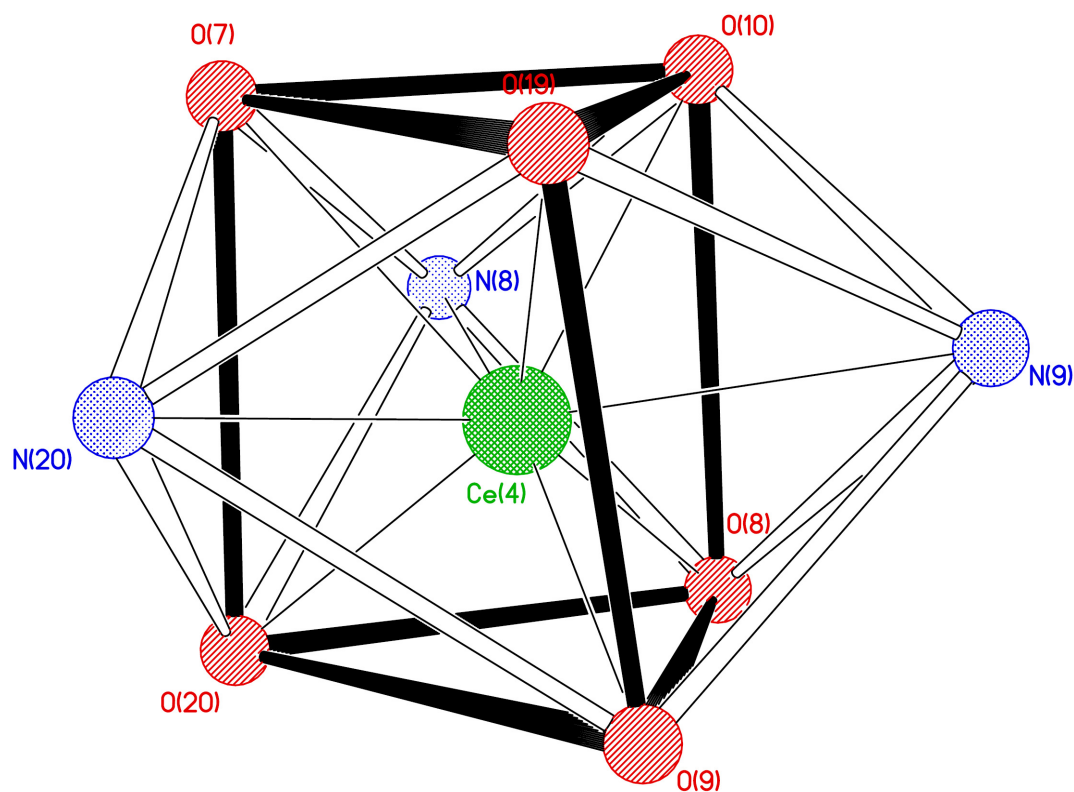

9. **Figure S7** Plot of  $\chi_M T$  vs.  $T$  per tetrahedron for a polycrystalline sample of compound **TE1**.

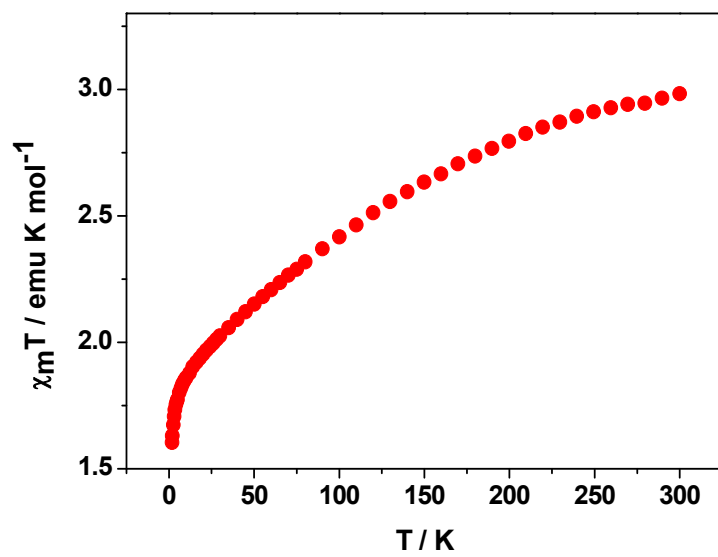

**10. Figure S8.1** The Uv-vis absorption spectra of  $H_2L^1$  (red line),  $TE1$  (black line) in DMF/acetonitrile solution (15:85, v/v). For a comparison, here the molar absorptivity of  $TE1$  is calculated as one sixth of the value of itself, corresponding to the number of ligands in the complex. .

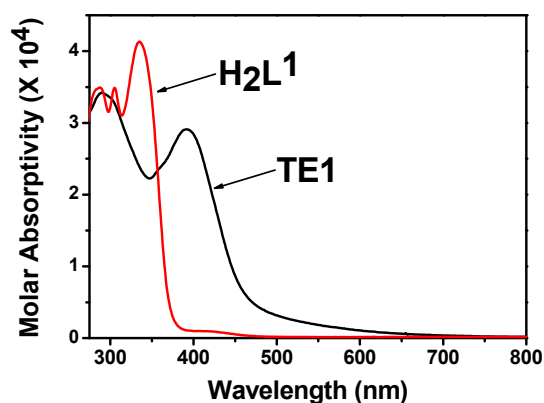

**Figure S8.2** The family of the Uv-vis absorption spectra of  $H_2L^2$  (red line),  $TE2$ (black line). For a comparison, here the molar absorptivity of  $TE2$  is calculated as one sixth of the value of itself, corresponding to the number of ligands in the complex.

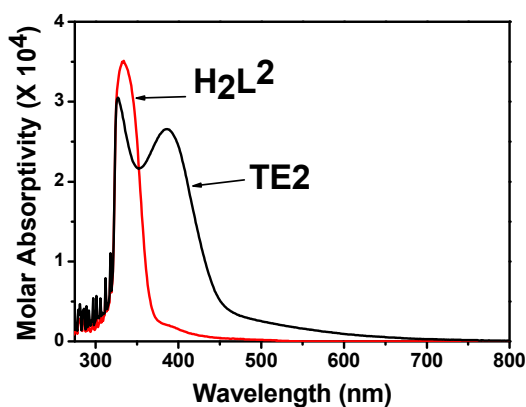

**11. Figure S9.1** Fluorescent spectrum of ligand  $H_2L^1$  (50  $\mu$ M, red line) and complex **TE1** (50  $\mu$ M, black line) in DMF/acetonitrile solution (15:85, v/v), excited at 360 nm..

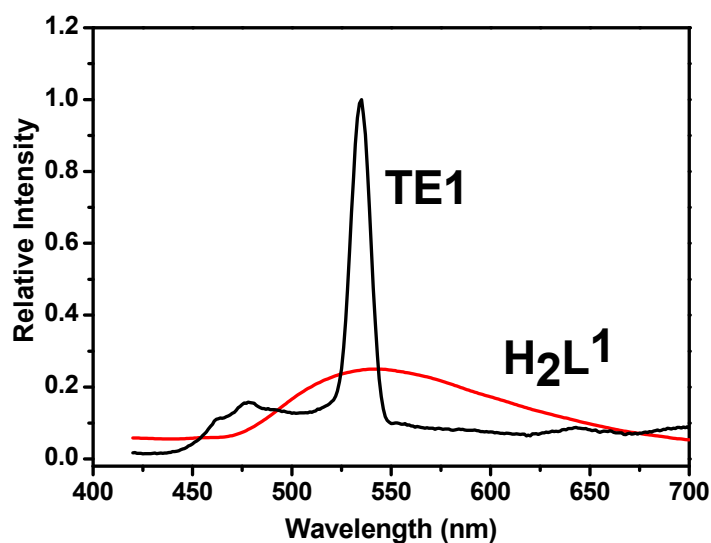

**Figure S9.2** Fluorescent response of ligand  $H_2L^2$  (50  $\mu$ M, red line) and complex **TE2** (50  $\mu$ M, black line) in DMF/acetone solution (5:95, v/v), excited at 320 nm.

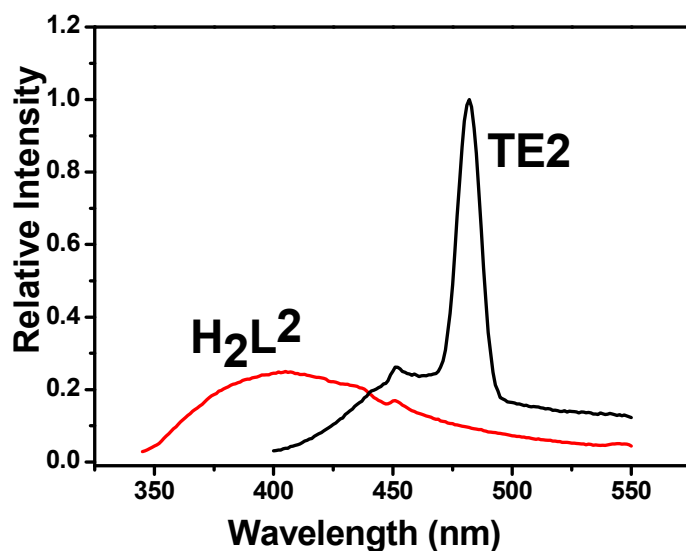

**12. Figure S10** Family of Uv-vis absorption spectra of **TE1** in DMF/acetonitrile solution (15:85, v/v, 4  $\mu$ M) upon the addition of various monosaccharides and disaccharides.

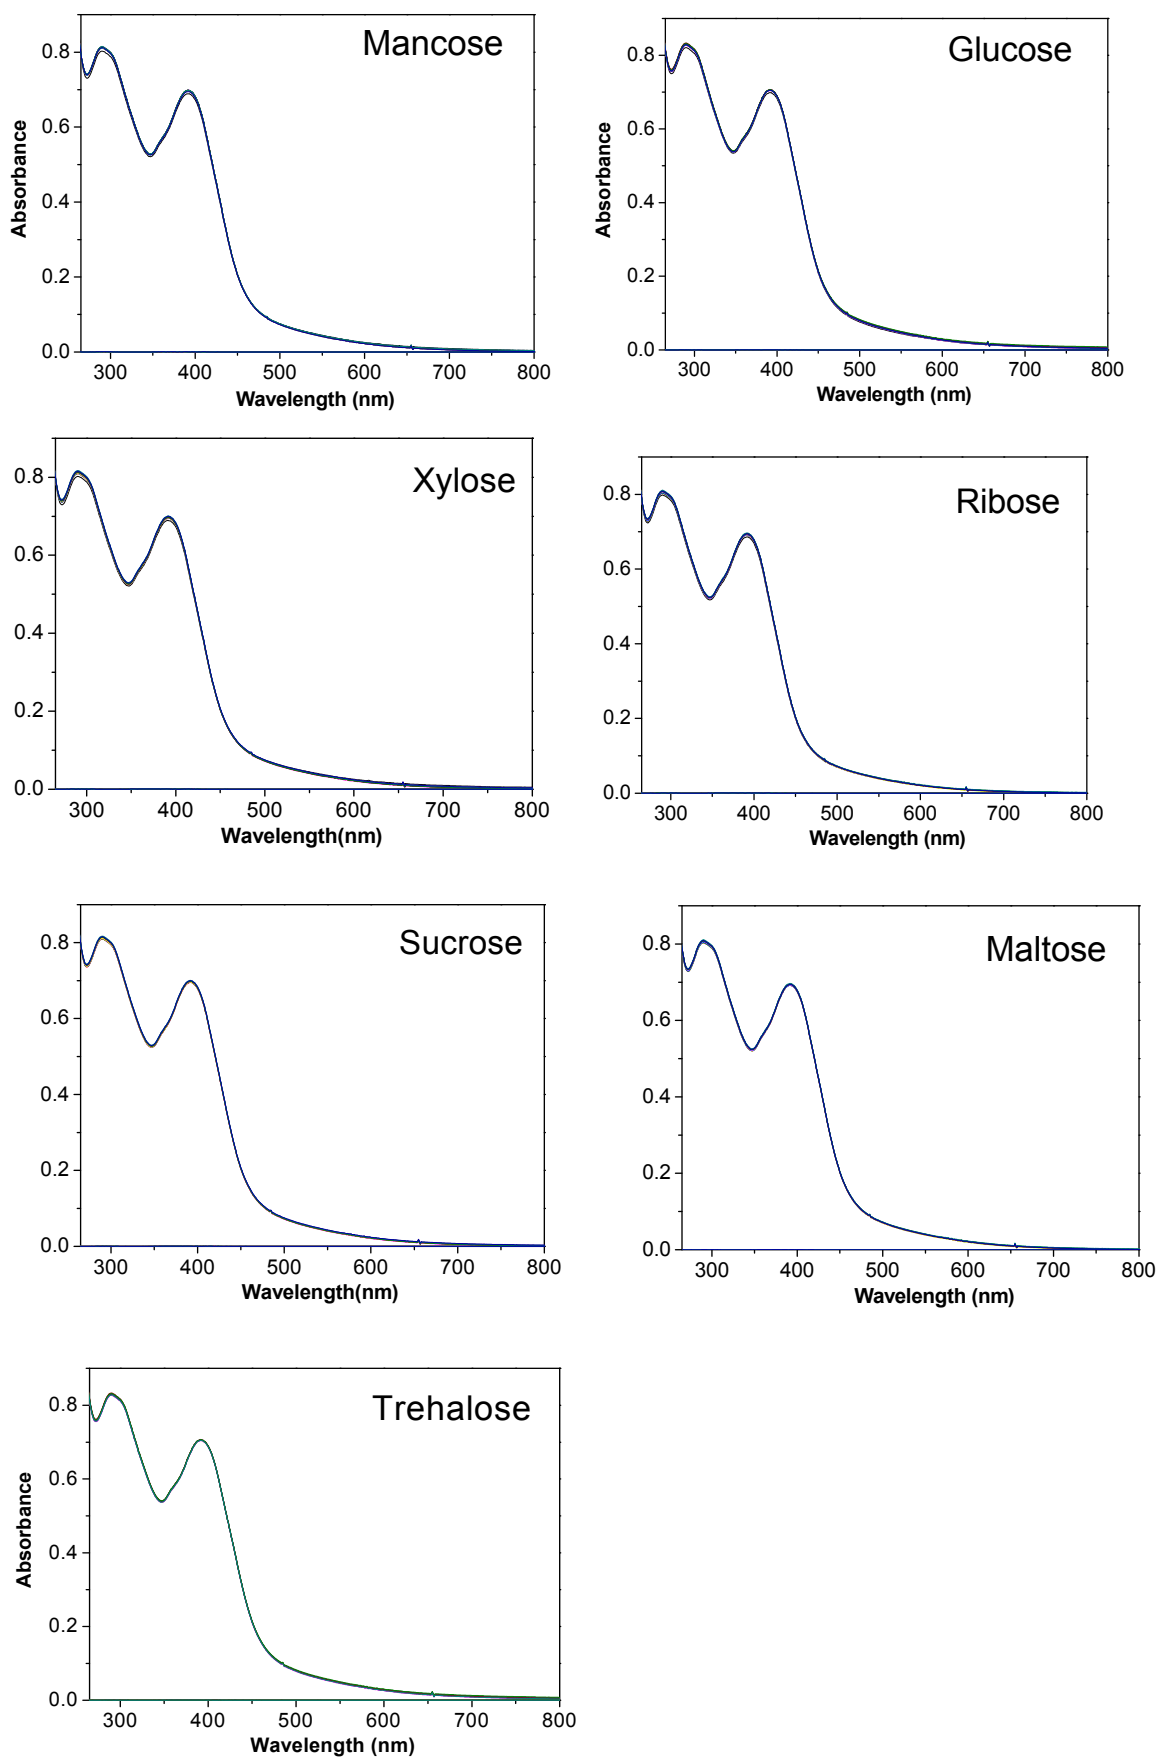

**13. Figure S11** Family of fluorescent spectra of **TE1** in DMF/acetonitrile solution (15:85, v/v, 50 $\mu$ M) upon the addition of various monosaccharides and disaccharides, excited at 360 nm.

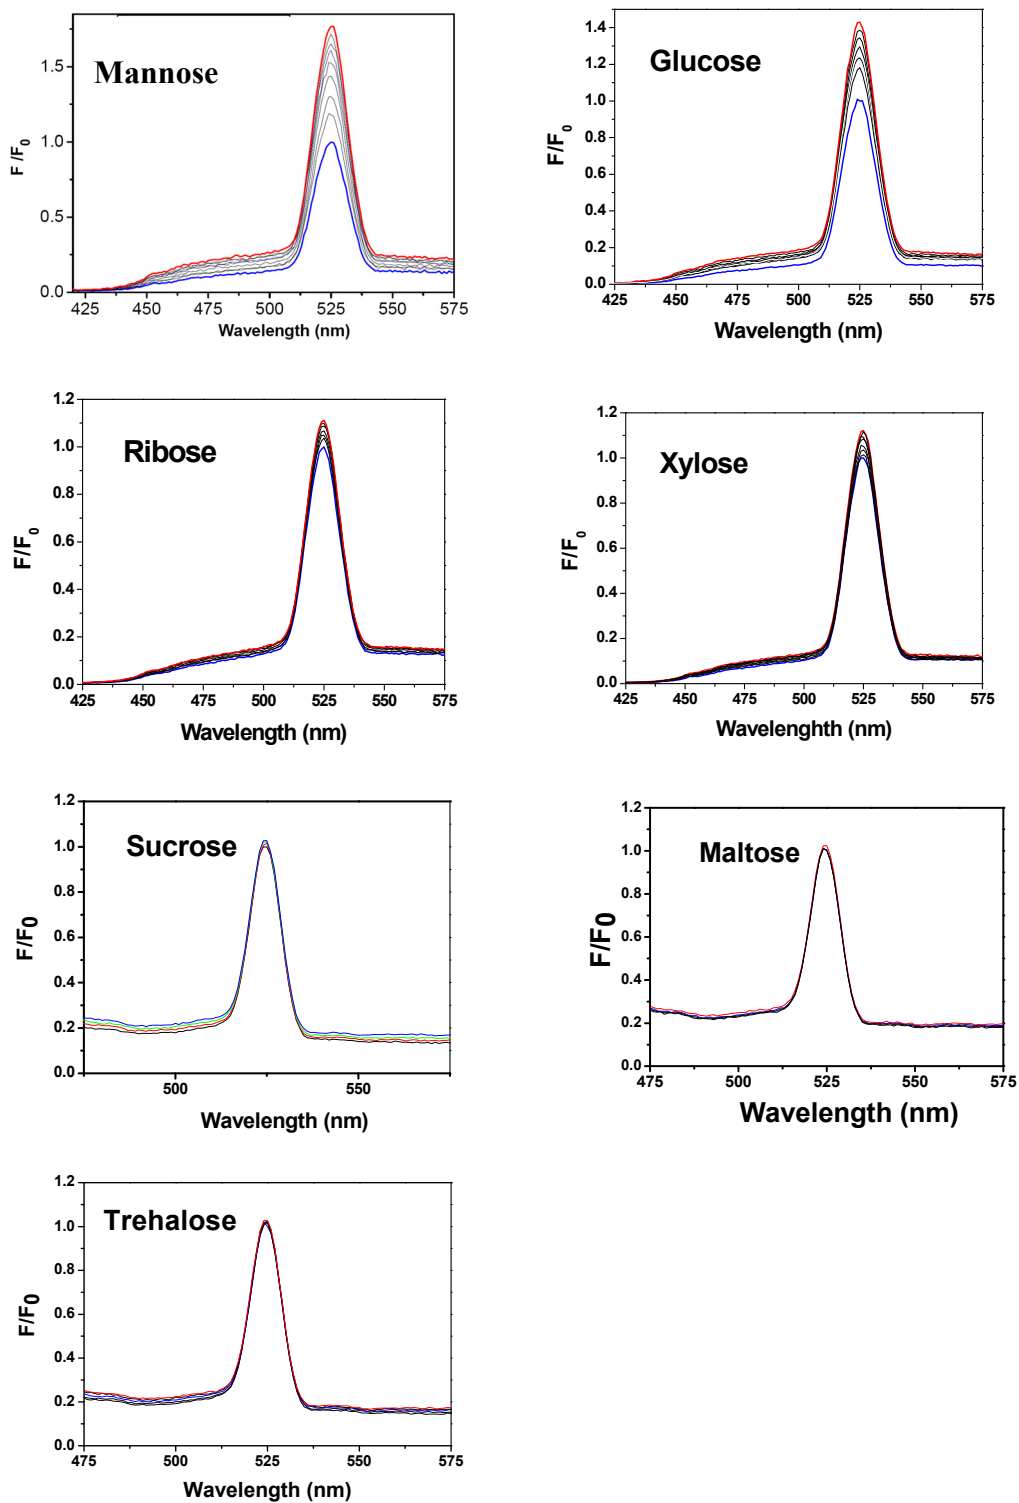

**14. Figure S12** Family of *Uv-vis* absorption spectra of **TE2** (4  $\mu$ M) in DMF/acetone solution (5:95, v/v) upon the addition of various monosaccharides and disaccharides.

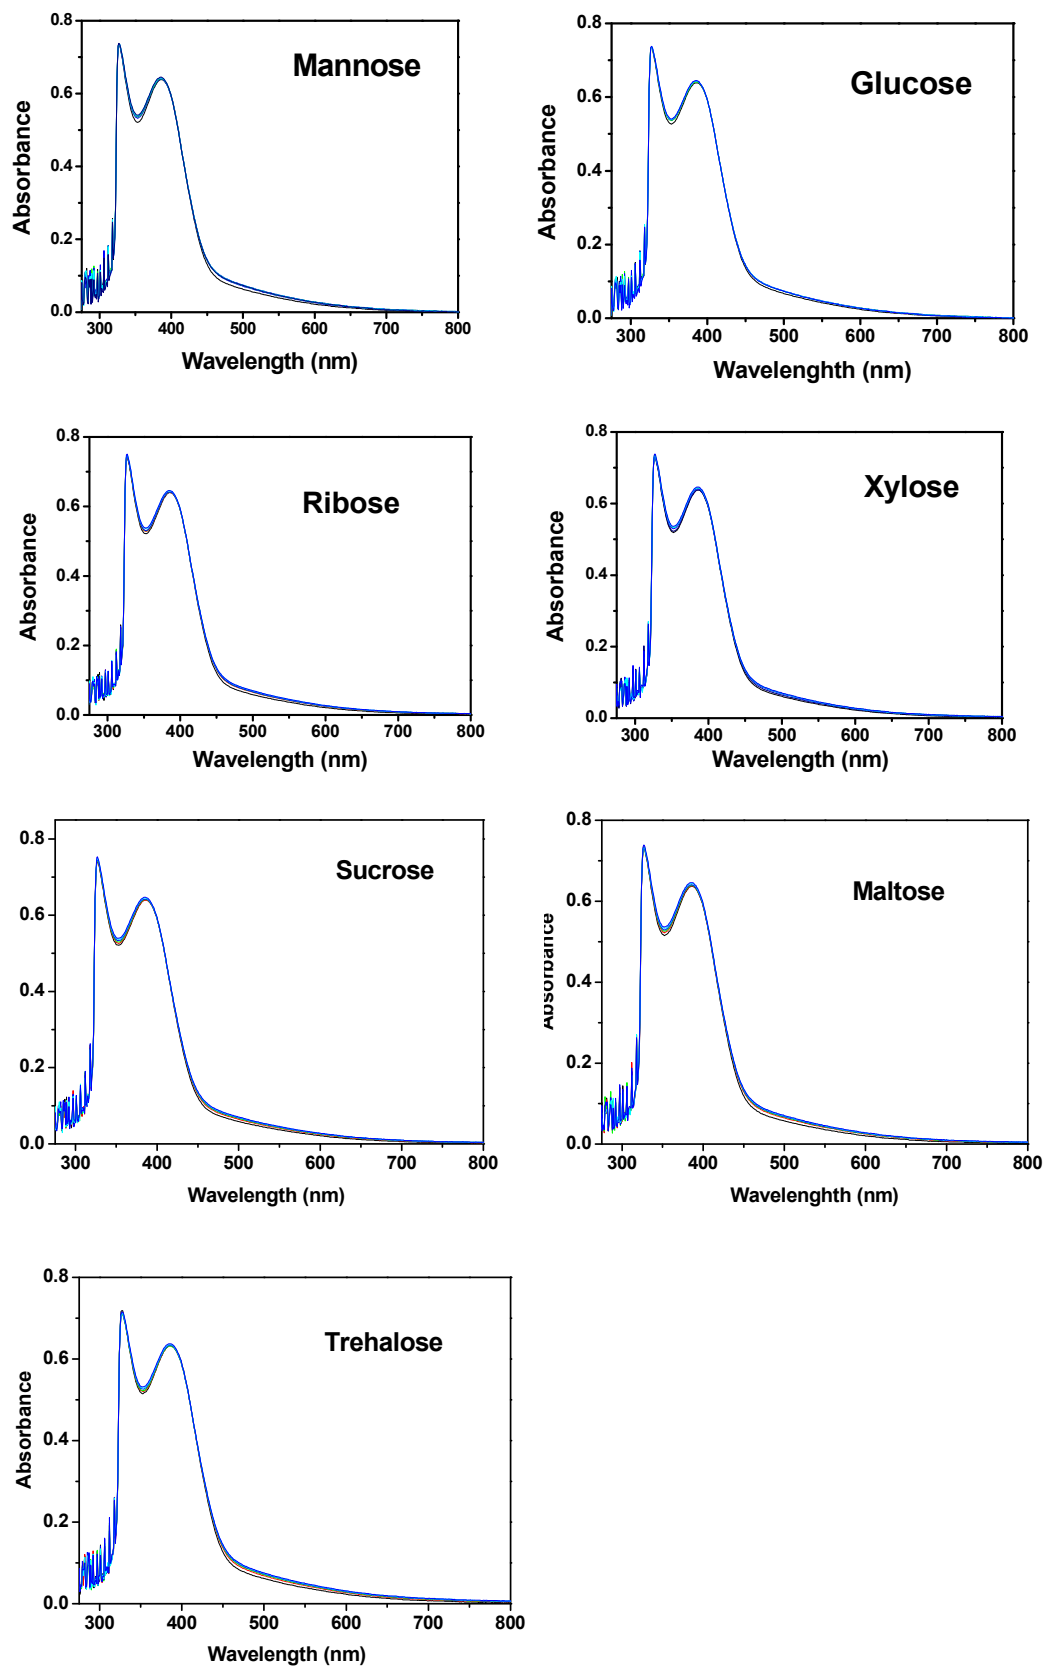



15. **Figure S13** Family of fluorescent spectra of **TE2** in DMF/acetone solution (5:95, v/v, 20 $\mu$ M) upon the addition of various monosaccharides and disaccharides, excited at 320 nm.

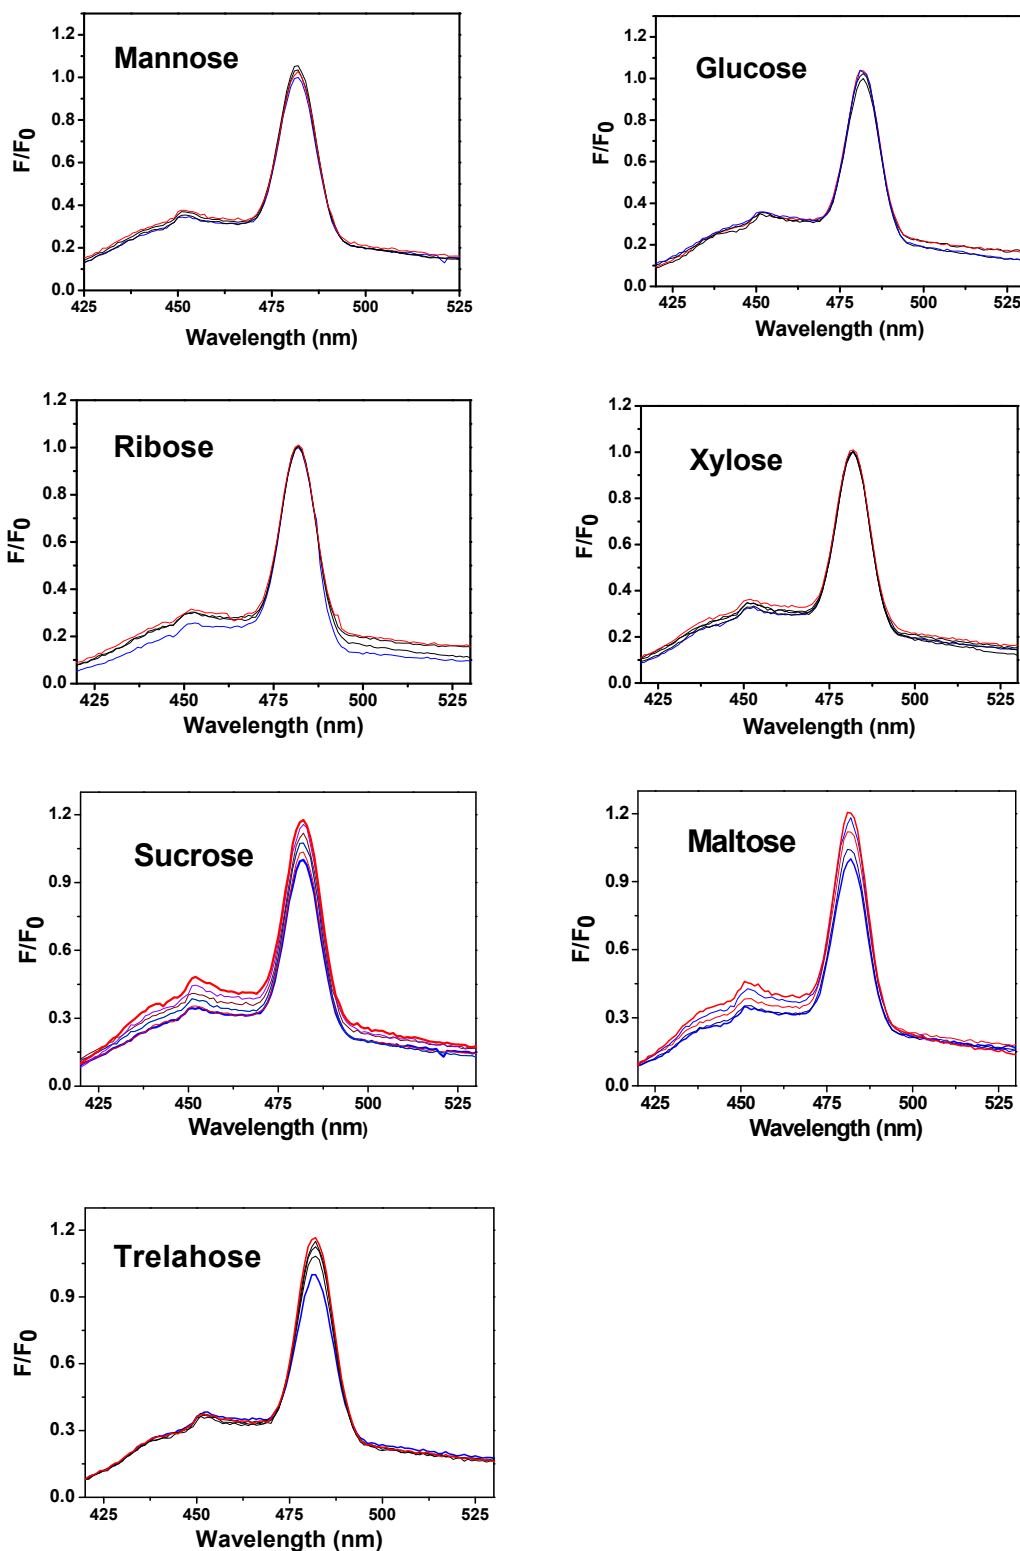

16. **Figure S14** Linear fit for  $\log[(F-F_0)/(F_L-F)]$  vs.  $\log[G]$  for corresponding titration curve of **TE2**.

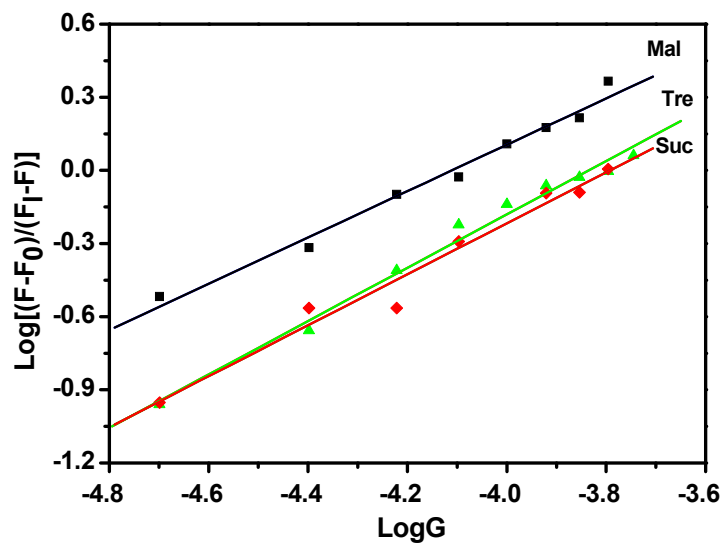

**17. Figure S15** XRD pattern of compound **TE1** data (bottom) and simulation of the XRD according to single crystal diffraction of **TE1** (top).

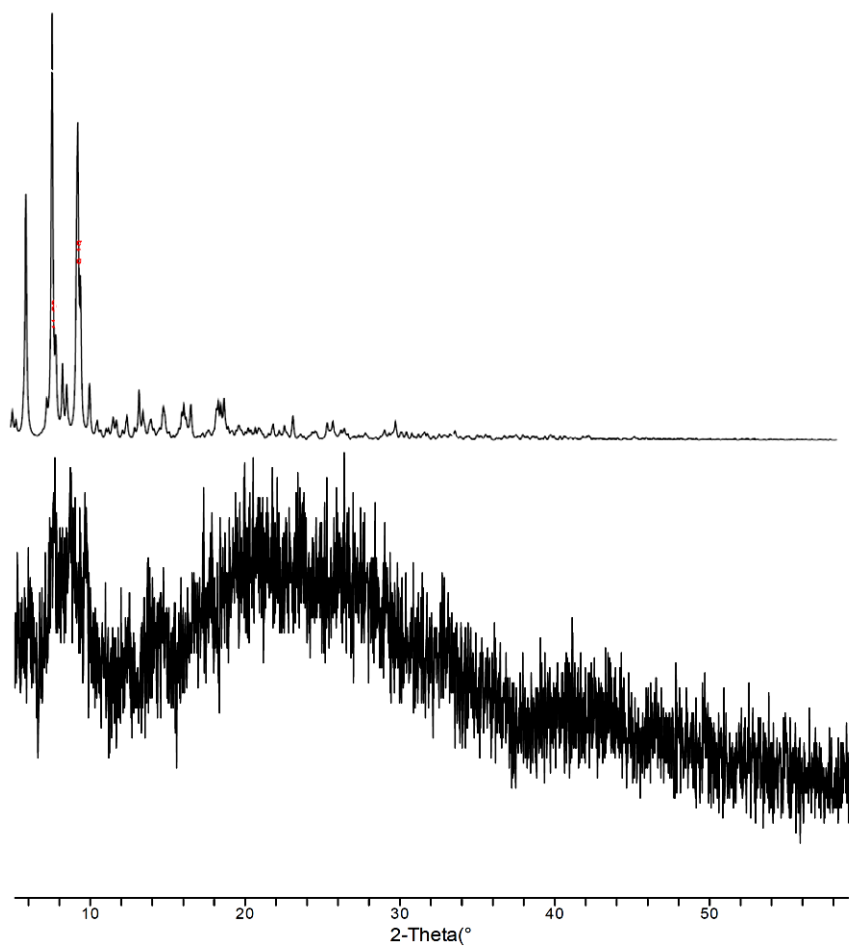

Supplement: b915358f.pdf [file b915358f.pdf]
